# Supplementary figures and images for: Icariin Attenuates Atherosclerosis via TNF/AKT/IL-6 Signaling Axis: Insights from Network Pharmacology and Experimental Validation in RAW264.7 Macrophages and ApoE −/− Mice
Source: Research Square preprint supplement (doi:10.21203/rs.3.rs-7377505/v1), 2025-08-26

## WB Raw Data

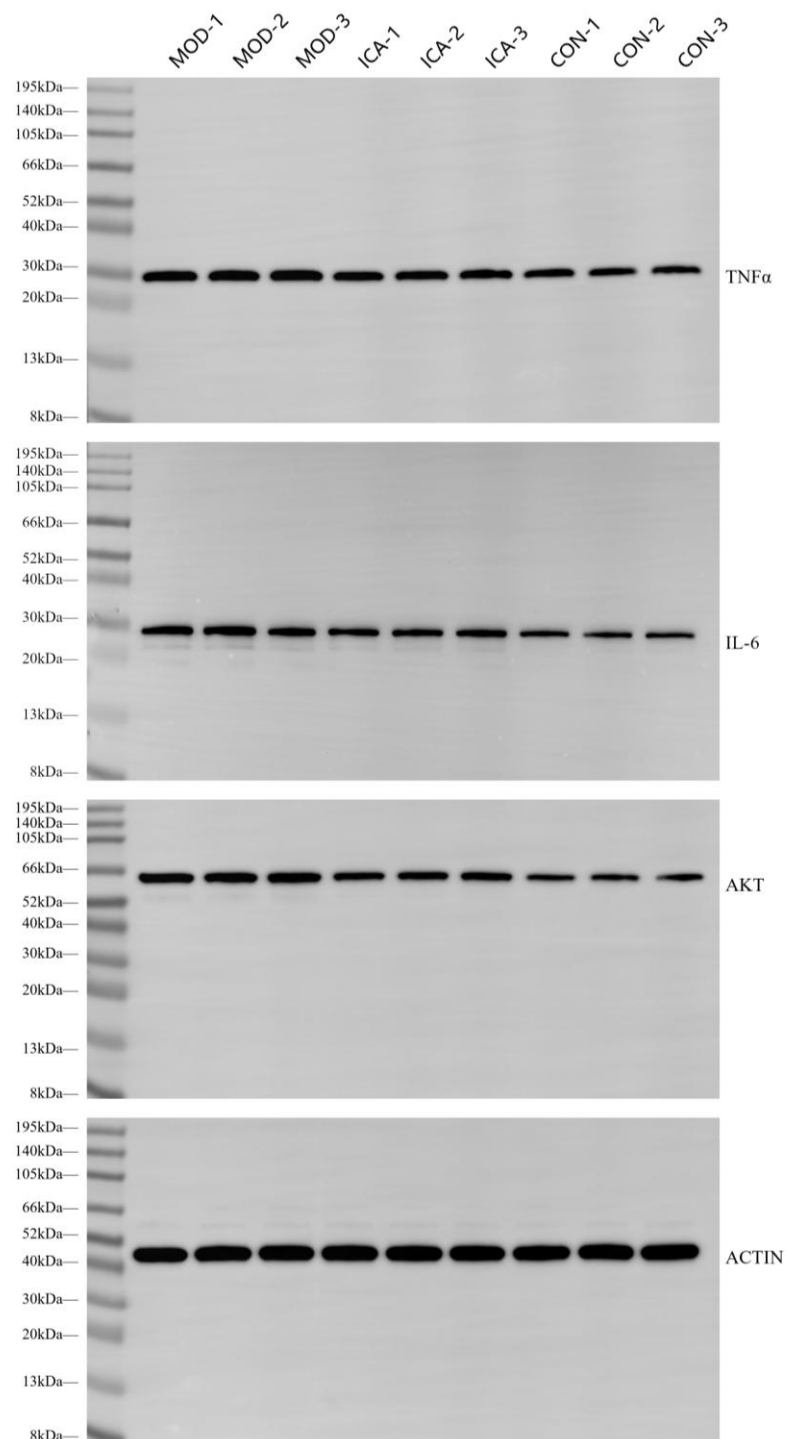

Figure S1. WB original blots.

Supplement: Supplementary file 1 [file 8ab736c636c91dbe335dbaa6.pdf]
